# Supplementary material
Source: PubMed Central journal article supplement (PMC7809784)
Supplement: EMBJ-40-e105499-s001.pdf [file EMBJ-40-e105499-s001.pdf]

**Appendix Table S1 : Supplementary Information about plasmids and antibodies**

| Plasmid constructs                |             | Primary antibodies                                 |                                               | Secondary antibodies |                                                     |
|-----------------------------------|-------------|----------------------------------------------------|-----------------------------------------------|----------------------|-----------------------------------------------------|
| Plasmid constructs                |             |                                                    |                                               |                      |                                                     |
| Construct names                   | Vector      | Forward Primer                                     | Reverse Primer                                | Restriction Sites    | Comment                                             |
| GST-Rab12                         | pGEX-4T-1   | CGCGGATCCATGGCAGGGG<br>ACAGAAAC                    | CGCGTCGACTTAGGAAGGAG<br>ATGGGCT               | EcoR1/Sal1           | To express GST-Rab12 in E.coli                      |
| His-Rab12                         | pET-28a     | CGCGGATCCATGGCAGGGG<br>ACAGAAAC                    | CGCGTCGACTTAGGAAGGAG<br>ATGGGCT               | EcoR1/Sal1           | To express His-Rab12 in E.coli                      |
| LV-GFP-Rab12                      | LV-GFP-C1   | TCTCGAGCTCAAGCTTCGAT<br>GGCAGGGGACAGAAACAGG<br>CAC | GCGGTACCGTCGACTGCAGAT<br>TAGGAAGGAGATGGGCTCTT | EcoR1                | lentivirus plasmid of GFP-Rab12                     |
| LV-GFP-Rab12 <sup>Q80L</sup>      | LV-GFP-C1   | TGGGATACAGCAGGCCTGG<br>AGCGGTTCCAGAGC              | GCTCTGGAACCGCTCCAGGCC<br>TGCTGTATCCCA         | EcoR1                | lentivirus plasmid of GFP-Rab12 <sup>Q80L</sup>     |
| LV-GFP-Rab12 <sup>S35N</sup>      | LV-GFP-C1   | AGTGCGGTGGGCAAGAACA<br>AACTCATGGAGAGA              | TCTCTCCATGAGTTTGTCTTG<br>CCCACCGCACT          | EcoR1                | lentivirus plasmid of GFP-Rab12 <sup>S35N</sup>     |
| LV-GFP-Rab12 <sup>D73GQ80L</sup>  | LV-GFP-C1   | CAAGACGATCCTTGTGGGCT<br>TCTGGGATACAGCAG            | CTGCTGTATCCCAGAAGCCCA<br>CAAGGATCGTCTTG       | EcoR1                | lentivirus plasmid of GFP-Rab12 <sup>D73GQ80L</sup> |
| LV-GFP-Rab12 <sup>D73G</sup>      | LV-GFP-C1   | CAAGACGATCCTTGTGGGCT<br>TCTGGGATACAGCAG            | CTGCTGTATCCCAGAAGCCCA<br>CAAGGATCGTCTTG       | EcoR1                | entivirus plasmid of GFP-Rab12 <sup>D73G</sup>      |
| pYr-1.1-GFP-Rab12                 | pYr-1.1-GFP | ACAAGTCCGGACTCAGAATG<br>GCAGGGGACAGAAACAGGC<br>A   | GCAGAGCGGCCGCGATTAGG<br>AAGGAGATGGGCTCTTG     | Bgl II               | to generate the adenovirus plasmid of GFP-Rab12     |
| pYr-1.1-GFP-Rab12 <sup>Q80L</sup> | pYr-1.1-GFP | ACAAGTCCGGACTCAGAATG<br>GCAGGGGACAGAAACAGGC        | GCAGAGCGGCCGCGATTAGG<br>AAGGAGATGGGCTCTTG     | Bgl II               | to generate the adenovirus plasmid of               |

|                                       |                   |                                                    |                                                      |        |                                                                     |
|---------------------------------------|-------------------|----------------------------------------------------|------------------------------------------------------|--------|---------------------------------------------------------------------|
|                                       |                   | A                                                  |                                                      |        | GFP-Rabl2 <sup>Q80L</sup>                                           |
| pYr-1.1-GFP-Rabl2 <sup>S35N</sup>     | pYr-1.1-GFP       | ACAAGTCCGGACTCAGAATG<br>GCAGGGGACAGAAACAGGC<br>A   | GCAGAGCGGCCGCGATTAGG<br>AAGGAGATGGGCTCTTGG           | Bgl II | to generate the adenovirus plasmid of GFP-Rabl2 <sup>S35N</sup>     |
| pYr-1.1-GFP-Rabl2 <sup>D73GQ80L</sup> | pYr-1.1-GFP       | ACAAGTCCGGACTCAGAATG<br>GCAGGGGACAGAAACAGGC<br>A   | GCAGAGCGGCCGCGATTAGG<br>AAGGAGATGGGCTCTTGG           | Bgl II | to generate the adenovirus plasmid of GFP-Rabl2 <sup>D73GQ80L</sup> |
| LV-RFP-Rabl2                          | LV-RFP-C1         | TCTCGAGCTCAAGCTTCGAT<br>GGCAGGGGACAGAAACAGG<br>CAC | GCGGTACCGTCGACTGCAGAT<br>TAGGAAGGAGATGGGCTCTT<br>GGT | EcoRI  | lentivirus plasmid of RFP-Rabl2                                     |
| LV-RFP-Rabl2 <sup>Q80L</sup>          | LV-RFP-C1         | TCTCGAGCTCAAGCTTCGAT<br>GGCAGGGGACAGAAACAGG<br>CAC | GCGGTACCGTCGACTGCAGAT<br>TAGGAAGGAGATGGGCTCTT<br>GGT | EcoRI  | lentivirus plasmid of RFP-Rabl2 <sup>Q80L</sup>                     |
| LV-RFP-Rabl2 <sup>S35N</sup>          | LV-RFP-C1         | TCTCGAGCTCAAGCTTCGAT<br>GGCAGGGGACAGAAACAGG<br>CAC | GCGGTACCGTCGACTGCAGAT<br>TAGGAAGGAGATGGGCTCTT<br>GGT | EcoRI  | lentivirus plasmid of RFP-Rabl2 <sup>S35N</sup>                     |
| LV-RFP-Rabl2 <sup>D73GQ80L</sup>      | LV-RFP-C1         | TCTCGAGCTCAAGCTTCGAT<br>GGCAGGGGACAGAAACAGG<br>CAC | GCGGTACCGTCGACTGCAGAT<br>TAGGAAGGAGATGGGCTCTT<br>GGT | EcoRI  | lentivirus plasmid of RFP-Rabl2 <sup>D73GQ80L</sup>                 |
| LV-3NG-Rabl2                          | LV-3×NeonGreen-C1 | AAGCTGCAAGCTTCGATGGC<br>AGGGGACAGAAACAGGC          | TACCGTCGACTGCAGTTAGGA<br>AGGAGATGGGCTCTTG            | EcoRI  | lentivirus plasmid of 3NG-Rabl2                                     |
| LV-3NG-Bbs5                           | LV-3×NeonGreen-C1 | AAGCTGCAAGCTTCGATGTC<br>TGTGCTGGACGTGTTGTGG        | TACCGTCGACTGCAGTCAACT<br>CATCACTTCCCAAAGTCC          | EcoRI  | lentivirus plasmid of 3NG-Bbs5                                      |

|                           |           |                                                    |                                              |       |                                                      |
|---------------------------|-----------|----------------------------------------------------|----------------------------------------------|-------|------------------------------------------------------|
| LV-Ift27-GFP              | LV-GFP-C1 | GAACCGTCAGATCCGATGGT<br>GAAGCTAGCTGCCAA            | TGGCGACCGGTAGCGCCACC<br>AGGGTATGGAATATGT     | NheI  | lentivirus plasmid of<br>GFP-Ift27                   |
| pFLAG-Ift81               | pFLAG-1   | ACGATGACAAGCTTGAAATG<br>AGTGACCAAATCAAATTC         | ACGATATCTCTAGAGTCAGAG<br>AACCAGCCGGTCCTC     | EcoRI | To express FLAG-Ift81<br>in E. coli                  |
| pFLAG-Ift74               | pFLAG-1   | ACGATGACAAGCTTGAAATG<br>GCCAGTAATCACAAATCTTC<br>AG | ACGATATCTCTAGAGTCAGCT<br>TCTGCTGGCATTATGTAGA | EcoRI | To express FLAG-Ift74<br>in E. coli                  |
| GST-Rab12 <sup>Q80L</sup> | pGEX-4T-1 | TGGGATACAGCAGGCCTGG<br>AGCGGTTCCAGAGC              | GCTCTGGAACCGCTCCAGGCC<br>TGCTGTATCCCA        | EcoRI | To express<br>GST-Rab12 <sup>Q80L</sup> in<br>E.coli |
| GST-Rab12 <sup>S35N</sup> | pGEX-4T-1 | AGTGCGGTGGGCAAGAACA<br>AACTCATGGAGAGA              | TCTCTCCATGAGTTTGTCTTG<br>CCCACCGCACT         | EcoRI | To express<br>GST-Rab12 <sup>S35N</sup> in<br>E.coli |

### Primary antibodies

| Name               | Antigen                          | Biological source | Manufacturer and catalog number | Dilution                    | WB/IF |
|--------------------|----------------------------------|-------------------|---------------------------------|-----------------------------|-------|
| Rab12              | mouse Rab12 (full-length)        | Rabbit            | Homemade                        | WB (1:3000);<br>IF (1:1000) | WB/IF |
| Rab12              | mouse Rab12                      | Genius Pig        | Homemade                        | IF (1:1000)                 | IF    |
| Acetylated-tubulin | sea urchin<br>Acetylated-tubulin | Mouse             | Sigma-Aldrich, T6793            | WB (1:5000);<br>IF (1:1000) | WB/IF |
| Rsph4a             | mouse Rsph4a                     | Rabbit            | Homemade                        | WB (1:1000)                 | WB    |
| Flag-M2            | Flag-M2                          | Rabbit            | Sigma-Aldrich, F7425            | WB (1:5000)                 | WB    |
| anti-His           | 6xHis                            | Mouse             | Sigma-Aldrich, H1029            | WB (1:3000)                 | WB    |

|          |                             |            |                                  |                             |       |
|----------|-----------------------------|------------|----------------------------------|-----------------------------|-------|
| GAPDH    | human GAPDH                 | Rabbit     | Proteintech, 10494-1-AP          | WB (1:3000)                 | WB    |
| GFP      | GFP                         | Rabbit     | Santa Cruz, sc-8334              | WB (1:3000)                 | WB    |
| GFP      | GFP                         | Chicken    | Invitrogen,A10262                | IF (1:500)                  | IF    |
| GST      | GST                         | Mouse      | Shanghai Wolwo Biotech, Mab-GS01 | WB (1:3000)                 | WB    |
| RFP      | RFP                         | Rat        | Chromotek, 5F8                   | WB (1:1000);<br>IF(1:500)   | WB/IF |
| Lamin B1 | human Lamin B1              | Rabbit     | Proteintech, 12987-1-AP          | WB (1:5000)                 | WB    |
| Cep162   | mouse Cep162 (1-300 aa)     | Genius Pig | Homemade                         | IF(1:200)                   | IF    |
| Cep164   | mouse Cep164 (1-400aa)      | Genius Pig | Homemade                         | WB (1:1000)                 | WB    |
| Cep290   | mouse Cep290 (2001-2479 aa) | Rabbit     | Homemade                         | IF(1:200)                   | IF    |
| GM130    | human GM130                 | Mouse      | BD,610823                        | WB(1:1000)                  | WB    |
| ARL13b   | human ARL13B                | Rabbit     | Proteintech, 17711-1-AP          | WB (1:1000);<br>IF(1:200)   | WB/IF |
| GLI1     | human GLI1                  | Rabbit     | CST, 2534S                       | WB(1:1000)                  | WB    |
| Gli2     | mouse Gli2                  | Goat       | R&D, AF3635                      | WB (1:1000);<br>IF (1:1000) | WB/IF |
| GLI3     | human GLI3                  | Goat       | R&D, AF3690                      | IF (1:1000)                 | IF    |
| SMO      | human SMO                   | Mouse      | Santa Cruz, sc-166685            | WB (1:500);                 | WB/IF |

|        |                              |        |                          |                           |       |
|--------|------------------------------|--------|--------------------------|---------------------------|-------|
|        |                              |        |                          | IF(1:100)                 |       |
| IFT25  | human IFT25                  | Rabbit | Proteintech, 15732-1-AP  | WB (1:1000)               | WB    |
| Ift27  | mouse Ift27<br>(full-length) | Rabbit | Homemade                 | WB (1:1000)               | WB    |
| IFT46  | human IFT46                  | Rabbit | Sigma, HPA037909         | WB (1:1000)               | WB    |
| IFT52  | human IFT52                  | Rabbit | Proteintech, 17534-1-AP  | WB (1:1000)               | WB    |
| IFT57  | human IFT57                  | Rabbit | Proteintech, 11083-1-AP  | WB (1:1000);<br>IF(1:200) | WB/IF |
| IFT74  | human IFT74                  | Goat   | Santa Cruz, SC-74365     | WB (1:1000)               | WB    |
| IFT80  | human IFT80                  | Rabbit | GeneTex, GTX109393       | WB(1:1000)                | WB    |
| IFT81  | human IFT81                  | Rabbit | Proteintech, 11744-1-AP  | WB (1:1000);<br>IF(1:200) | WB/IF |
| IFT139 | human IFT139                 | Rabbit | Sigma-Aldrich, HPA035495 | WB(1:1000)                | WB    |
| IFT140 | human IFT140                 | Rabbit | Proteintech, 17460-1-AP  | WB(1:1000)                | WB    |
| BBS1   | human BBS1                   | Rabbit | Proteintech, 21118-1-AP  | WB(1:1000)                | WB    |
| BBS5   | human BBS5                   | Rabbit | Proteintech, 14569-1-AP  | WB (1:1000);<br>IF(1:200) | WB/IF |
| BBS7   | human BBS7                   | Rabbit | Proteintech, 13458-1-AP  | WB (1:1000);<br>IF(1:200) | WB/IF |
| LZTFL1 | human<br>LZTFL1              | Rabbit | Proteintech, 17073-1-AP  | WB (1:1000);<br>IF(1:200) | WB/IF |
| GPR161 | human<br>GPR161              | Rabbit | Proteintech, 13398-1-AP  | WB (1:1000);<br>IF(1:200) | WB/IF |
| ARL6   | human ARL6                   | Rabbit | Proteintech, 12676-1-AP  | WB (1:1000);              | WB/IF |

|                                           |                   |                                    |          | IF(1:200) |  |
|-------------------------------------------|-------------------|------------------------------------|----------|-----------|--|
| <b>Secondary antibodies</b>               |                   |                                    |          |           |  |
| Name                                      | Biological source | Manufacturer and catalog number    | Dilution | WB/IF     |  |
| anti-Mouse IgG, HRP conjugate             | Goat              | Life Technologies,G-21040          | 1:5,000  | WB        |  |
| anti-Rabbit IgG, HRP conjugate            | Goat              | Life Technologies,G-21234          | 1:5,000  | WB        |  |
| anti-Goat IgG (H+L)-HRP                   | Rabbit            | Life Technologies, R-21459         | 1:5,000  | WB        |  |
| anti-Rat IgG, HRP conjugate               | Goat              | abclonal, AS028                    | 1:5,000  | WB        |  |
| Alexa Fluor 405 anti-mouse IgG(H+L)       | Goat              | Molecular Probes,A31553            | 1:500    | IF        |  |
| Alexa Fluor 405 anti-rabbit IgG(H+L)      | Goat              | Molecular Probes,A31556            | 1:500    | IF        |  |
| Anti-Rabbit IgG Alexa Fluor 488 conjugate | Donkey            | Molecular Probes,A21206            | 1:1,000  | IF        |  |
| Anti-Mouse IgG Alexa Fluor 488 conjugate  | Donkey            | Molecular Probes,A21202            | 1:1,000  | IF        |  |
| Alexa Fluor 488 anti-chicken IgG(H+L)     | Goat              | Molecular Probes,A11039            | 1:1,000  | IF        |  |
| Anti-Rabbit IgG Cy3 conjugate             | Donkey            | Jackson ImmunoResearch,711-165-152 | 1:1,000  | IF        |  |
| Anti-Mouse IgG,Cy3                        | Donkey            | Jackson                            | 1:1,000  | IF        |  |

|                                                       |        |                                    |         |    |  |
|-------------------------------------------------------|--------|------------------------------------|---------|----|--|
| conjugate                                             |        | ImmunoResearch,715-165-151         |         |    |  |
| Alexa Fluor 546 donkey anti-goat IgG(H+L)             | donkey | Molecular Probes,A11056            | 1:1,000 | IF |  |
| Alexa Fluor 546 anti-rat IgG(H+L)                     | Goat   | Molecular Probes,A11081            | 1:500   | IF |  |
| Alexa Fluor® 647-AffiniPure Anti-Guinea Pig IgG (H+L) | Donkey | Jackson ImmunoResearch,706-605-148 | 1:1,000 | IF |  |
